# Supplementary material for: Structural and thermodynamic basis of proline-induced transmembrane complex stabilization
Source: PubMed Central journal article supplement (PMC4951694; doi:10.1038/srep29809), 2016-07-20
Supplement: srep29809-s1.pdf [file srep29809-s1.pdf]

# **SUPPLEMENTARY INFORMATION**

## **Structural and Thermodynamic Basis of Proline-induced Transmembrane Complex Stabilization**

Thomas Schmidt, Alan J. Situ, and Tobias S. Ulmer

Department of Biochemistry & Molecular Biology and Zilkha Neurogenetic Institute, Keck School of  
Medicine, University of Southern California, 1501 San Pablo Street, Los Angeles, CA 90033, USA

### **TABLE OF CONTENTS**

|                                                                                                               |   |
|---------------------------------------------------------------------------------------------------------------|---|
| <b>Supplementary Figure S1.</b> Superposition of integrin $\alpha$ IIb $\beta$ 3(A711P) TM complex structures | 2 |
| <b>Supplementary Table S1.</b> Structural statistics for integrin $\alpha$ IIb $\beta$ 3(A711P) TM complex    | 3 |

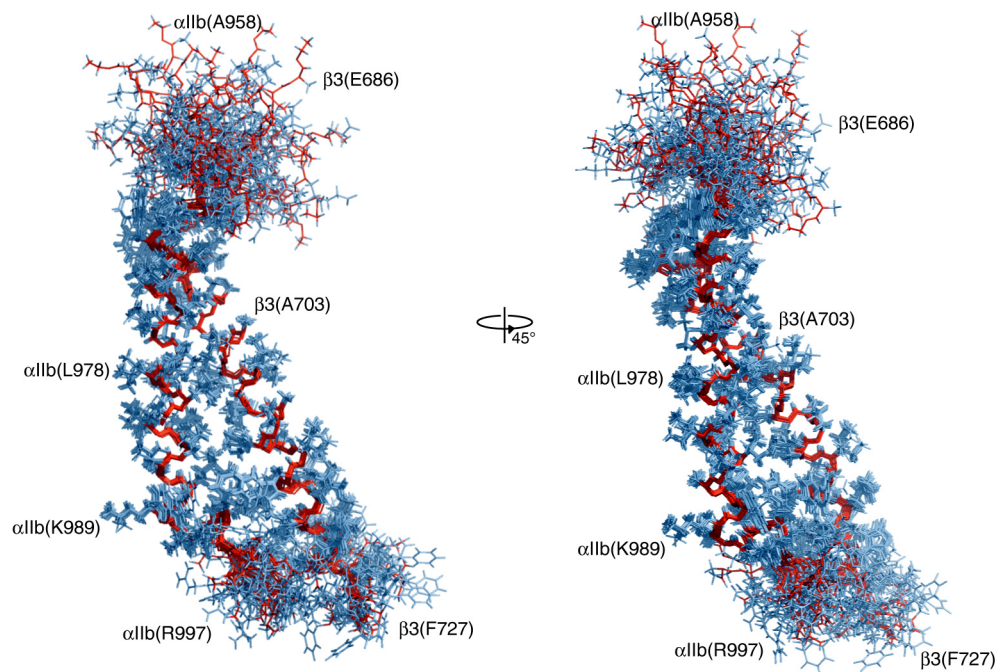

**Supplementary Figure S1.** Superposition of all 20 calculated simulated annealing structures of the integrin  $\alpha$ IIb $\beta$ 3(A711P) TM complex. The backbones and sidechains are shown in *red* and *blue*, respectively.

**Supplementary Table S1.** Structural statistics for the integrin  $\alpha$ IIb $\beta$ 3(A711P) TM complex<sup>a</sup>

---

|                                                                                          |               |
|------------------------------------------------------------------------------------------|---------------|
| R.m.s. deviations from experimental dihedral restraints (deg)                            |               |
| All (155) <sup>b</sup>                                                                   | 0.6 ± 0.1     |
| R.m.s. deviations from experimental residual dipolar couplings (Hz) <sup>c</sup>         |               |
| <sup>1</sup> D <sub>NH</sub> (30), $\alpha$ IIb(A963C)– $\beta$ 3(G690C/A711P)           | 1.02 ± 0.04   |
| <sup>1</sup> D <sub>NH</sub> (30), $\alpha$ IIb(A963C)– $\beta$ 3(G690C/A711P)           | 0.57 ± 0.03   |
| <sup>1</sup> D <sub>NH</sub> (30), $\alpha$ IIb                                          | 0.98 ± 0.03   |
| <sup>1</sup> D <sub>N<sup>c</sup></sub> (29), $\alpha$ IIb                               | 0.85 ± 0.04   |
| <sup>1</sup> D <sub>C<math>\alpha</math>C<sup>c</sup></sub> (30), $\alpha$ IIb           | 0.95 ± 0.04   |
| <sup>1</sup> D <sub>NH</sub> (30), $\beta$ 3(A711P,K716A)                                | 1.96 ± 0.09   |
| <sup>1</sup> D <sub>N<sup>c</sup></sub> (29), $\beta$ 3(A711P,K716A)                     | 1.90 ± 0.08   |
| <sup>1</sup> D <sub>C<math>\alpha</math>C<sup>c</sup></sub> (30), $\beta$ 3(A711P,K716A) | 1.85 ± 0.11   |
| R.m.s. deviations from experimental distance restraints (Å)                              |               |
| All (163)                                                                                | 0.06 ± 0.01   |
| Intraresidue (4)                                                                         | 0.01 ± 0.01   |
| Interresidue sequential ( i – j  = 1) (59)                                               | 0.03 ± 0.01   |
| Interresidue short range (1 <  i – j  < 5) (69)                                          | 0.07 ± 0.01   |
| Interresidue long range ( i – j  ≥ 5) (31)                                               | 0.08 ± 0.01   |
| Deviations from idealized covalent geometry                                              |               |
| Bonds (Å)                                                                                | 0.003 ± 0.000 |
| Angles (deg)                                                                             | 0.59 ± 0.02   |
| Impropers (deg)                                                                          | 0.54 ± 0.01   |
| Coordinate precision (Å) <sup>d</sup>                                                    |               |
| Backbone non-hydrogen atoms                                                              | 0.33          |
| All non-hydrogen atoms                                                                   | 0.70          |
| Measures of structural quality                                                           |               |
| E <sub>LJ</sub> (kcal mol <sup>-1</sup> ) <sup>3 e</sup>                                 | -311.9        |
| Residues in most favorable region of Ramachandran plot <sup>f</sup>                      | 99.5%         |

---

<sup>a</sup>Statistics for all 20 calculated simulated annealing structures, encompassing structured residues  $\alpha$ IIb(I966-R995) and  $\beta$ 3(I963-D723).

<sup>b</sup>Torsion angle restraints included 64  $\phi$ , 64  $\psi$ , and 27  $\chi_1$  angles.

<sup>c</sup>R.m.s. deviations are normalized to an alignment tensor magnitude of 10 Hz.

<sup>d</sup>Defined as the average r.m.s. difference between the 20 simulated annealing structures and the mean coordinates.

<sup>e</sup>The Lennard–Jones van der Waals energy was calculated with the CHARMM PARAM 19/20 parameters and not included in the simulated annealing target function.

<sup>f</sup>Calculated using PROCHECK V3.4.4 (Laskowski RA, Macarthur MW, Moss DS, Thornton JM. Procheck - A Program To Check The Stereochemical Quality Of Protein Structures. J Appl Crystallogr 26, 283-291 (1993)).
